# Supplementary material for: Trends and protective factors of female genital mutilation in Burkina Faso: 1999 to 2010
Source: PubMed Central journal article supplement (PMC4437659; doi:10.1186/s12939-015-0171-1), 2015-05-08
Supplement: 12939_2015_171_MOESM1_ESM.pdf [file 12939_2015_171_MOESM1_ESM.pdf]

Additional file 1. Ethnic Map of Burkina Faso

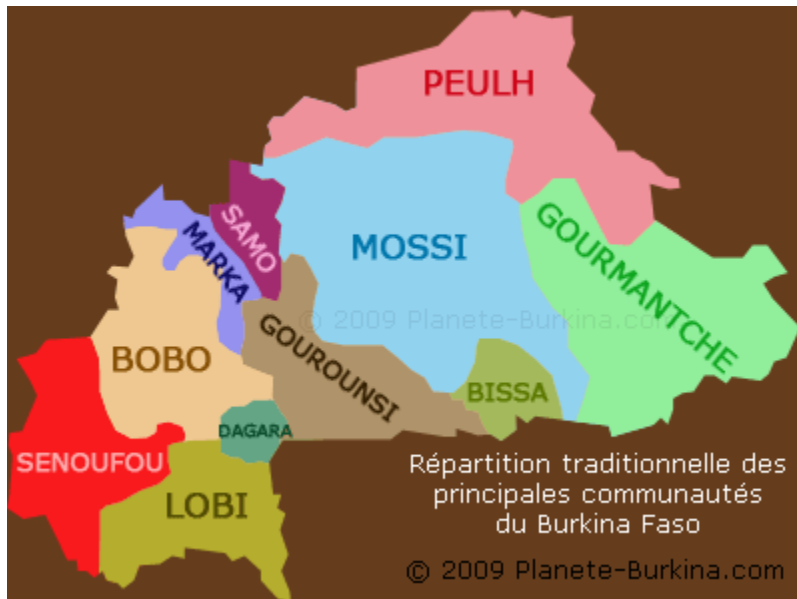

Source: [http://www.planete-burkina.com/ethnies\\_burkina\\_faso.php](http://www.planete-burkina.com/ethnies_burkina_faso.php)
